# Supplementary material for: Hepatitis E Seroprevalence in Europe: A Meta-Analysis
Source: PubMed Central journal article supplement (PMC4997573; doi:10.3390/v8080211), 2016-08-06

## Supplementary Materials: Hepatitis E Seroprevalence in Europe: A Meta-Analysis

Johannes Hartl, Benjamin Otto, Richie Guy Madden, Glynn Webb, Kathy Louise Woolson, Levente Kriston, Eik Vettorazzi, Ansgar W. Lohse, Harry Richard Dalton, Sven Pischke

**Table S1.** Number of included studies per country

| <b>Country</b> | <b>Number of Studies per Country</b> |
|----------------|--------------------------------------|
| Austria        | 2                                    |
| Belgium        | 1                                    |
| Czech Republic | 1                                    |
| Denmark        | 3                                    |
| France         | 14                                   |
| Germany        | 15                                   |
| Italy          | 6                                    |
| Netherlands    | 8                                    |
| Spain          | 11                                   |
| Switzerland    | 3                                    |
| UK             | 9                                    |
| <b>TOTAL</b>   | <b>73</b>                            |

---

**Table S2.** All included studies and data extracted from each study

| Journal                         | Year        | First Author | Subcohort                 | Number of Patients | Sero-Prevalence | Test          | Cohort                    | Country        |
|---------------------------------|-------------|--------------|---------------------------|--------------------|-----------------|---------------|---------------------------|----------------|
| PloS One                        | 2014        | Lagler       |                           | 997                | 14.3            | Wantai        | General Population        | Austria        |
| PLoS One                        | 2015        | Fischer      |                           | 58,915             | 13.55           | Wantai        | General Population        | Austria        |
| Acta Gastroenterol Belg         | 2012        | Van Hoecke F |                           | 100                | 14              | Other         | General Population        | Belgium        |
| Epidemiol Mikrobiol Immunol     | 2014        | Strakov      |                           | 230                | 5.7             | Dia.Pro       | General Population        | Czech Republik |
| Clin infect dis                 | 2008        | Christensen  | samples collected in 1983 | 169                | 32.5            | Other         | General Population        | Denmark        |
| Clin infect dis                 | 2008        | Christensen  | samples collected in 1983 | 291                | 50.3            | Other         | Swine/Forestry Workers    | Denmark        |
| Clin infect dis                 | 2008        | Christensen  | samples collected 2003    | 461                | 20.6            | Other         | General Population        | Denmark        |
| <b>Tansfusion</b>               | <b>2015</b> | <b>Holm</b>  |                           | <b>504</b>         | <b>10.7</b>     | <b>Other</b>  | <b>General Population</b> | <b>Denmark</b> |
| <b>Tansfusion</b>               | <b>2015</b> | <b>Holm</b>  |                           | <b>504</b>         | <b>19.8</b>     | <b>Wantai</b> | <b>General Population</b> | <b>Denmark</b> |
| AIDS                            | 2010        | Renou        | southern patients         | 112                | 3               | Adaltis       | Immune Deficiency         | France         |
| AIDS                            | 2010        | Renou        | northern patients         | 133                | 9               | Adaltis       | Immune Deficiency         | France         |
| Emerg Infect Dis                | 2011        | Mansuy       |                           | 512                | 52.5            | Wantai        | General Population        | France         |
| Eur J Clin Microbiol Infect Dis | 2014        | Buffaz       |                           | 142                | 29              | Wantai        | General Population        | France         |
| Int J Infect Dis                | 2013        | Vernier      |                           | 43                 | 48.8            | Wantai        | General Population        | France         |
| Int J Infect Dis                | 2013        | Vernier      |                           | 43                 | 30.2            | Adaltis       | Swine/Forestry Workers    | France         |
| J Clin Microbiol                | 2007        | Boutrouille  |                           | 1998               | 3.2             | MP            | General Population        | France         |
| J Clin Virol                    | 2012        | Carpentier   |                           | 593                | 31              | MP            | Swine/Forestry Workers    | France         |

|                      |             |                       |             |             |                 |                           |                |
|----------------------|-------------|-----------------------|-------------|-------------|-----------------|---------------------------|----------------|
| J Clin Virol         | 2012        | Maylin                | 261         | 1.5         | MP              | Immune Deficiency         | France         |
| J Clin Virol         | 2012        | Maylin                | 46          | 6.5         | MP              | Transplant                | France         |
| J Clin Virol         | 2013        | Chaussade             | 322         | 26.2        | MP              | General Population        | France         |
| J Clin Virol         | 2013        | Chaussade             | 231         | 36          | MP              | Immune Deficiency         | France         |
| J Clin Virol         | 2013        | Chaussade             | 306         | 43.6        | MP              | Swine/Forestry Workers    | France         |
| <b>J Clin Virol</b>  | <b>2013</b> | <b>Rossi-Tamisier</b> | <b>64</b>   | <b>10.9</b> | <b>Adaltis</b>  | <b>Transplant</b>         | <b>France</b>  |
| <b>J Clin Virol</b>  | <b>2013</b> | <b>Rossi-Tamisier</b> | <b>64</b>   | <b>31.3</b> | <b>Wantai</b>   | <b>Transplant</b>         | <b>France</b>  |
| J Infect Dis.        | 2014        | Abravanel             | 263         | 38.4        | Wantai          | Transplant                | France         |
| J Med Virol          | 2008        | Mansuy                | 529         | 16.6        | MP              | General Population        | France         |
| J Med Virol          | 2011        | Kaba                  | 184         | 4.4         | Adaltis         | Immune Deficiency         | France         |
| J Virol              | 2014        | Renou                 | 315         | 7.74        | Wantai          | General Population        | France         |
| Euro Surveill        | 2015        | Mansuy                | 3353        | 39          | Wantai          | General Population        | France         |
| Am J Transplant      | 2012        | Pischke               | 274         | 11          | MP              | Transplant                | Germany        |
| Emerg Infect Dis     | 2012        | Faber                 | 4352        | 16.8        | Mikrogen        | General Population        | Germany        |
| <b>Hepatology</b>    | <b>2014</b> | <b>Wenzel</b>         | <b>1092</b> | <b>14.5</b> | <b>Mikrogen</b> | <b>General Population</b> | <b>Germany</b> |
| <b>Hepatology</b>    | <b>2014</b> | <b>Wenzel</b>         | <b>1092</b> | <b>34</b>   | <b>Other</b>    | <b>General Population</b> | <b>Germany</b> |
| J Clin Microbiol.    | 2012        | Vollmer               | 200         | 6           | Mikrogen        | General Population        | Germany        |
| <b>J Infect Dis.</b> | <b>2012</b> | <b>Wenzel</b>         | <b>200</b>  | <b>18</b>   | <b>Mikrogen</b> | <b>General Population</b> | <b>Germany</b> |
| <b>J Infect Dis.</b> | <b>2012</b> | <b>Wenzel</b>         | <b>200</b>  | <b>4.5</b>  | <b>MP</b>       | <b>General Population</b> | <b>Germany</b> |
| <b>J Infect Dis.</b> | <b>2012</b> | <b>Wenzel</b>         | <b>200</b>  | <b>29.5</b> | <b>Other</b>    | <b>General Population</b> | <b>Germany</b> |
| J Viral Hepat        | 2010        | Pischke               | 123         | 5           | Abbott          | Immune Deficiency         | Germany        |
| Liver Transpl        | 2010        | Pischke               | 108         | 1           | Abbott          | General Population        | Germany        |
| Liver Transpl        | 2010        | Pischke               | 129         | 3           | Abbott          | Liver Disease             | Germany        |
| Liver Transpl        | 2010        | Pischke               | 262         | 4           | Abbott          | Transplant                | Germany        |

|                            |             |                  |              |            |             |                 |                               |                |
|----------------------------|-------------|------------------|--------------|------------|-------------|-----------------|-------------------------------|----------------|
| <b>Med Mibrobiol Immun</b> | <b>2014</b> | <b>Krumbholz</b> |              | <b>235</b> | <b>8.5</b>  | <b>Mikrogen</b> | <b>General Population</b>     | <b>Germany</b> |
| <b>Med Mibrobiol Immun</b> | <b>2014</b> | <b>Krumbholz</b> |              | <b>235</b> | <b>2.6</b>  | <b>MP</b>       | <b>General Population</b>     | <b>Germany</b> |
| <b>Med Mibrobiol Immun</b> | <b>2014</b> | <b>Krumbholz</b> |              | <b>235</b> | <b>7.7</b>  | <b>Other</b>    | <b>General Population</b>     | <b>Germany</b> |
| <b>Med Mibrobiol Immun</b> | <b>2014</b> | <b>Krumbholz</b> |              | <b>302</b> | <b>17.9</b> | <b>Mikrogen</b> | <b>Swine/Forestry Workers</b> | <b>Germany</b> |
| <b>Med Mibrobiol Immun</b> | <b>2014</b> | <b>Krumbholz</b> |              | <b>302</b> | <b>3.5</b>  | <b>MP</b>       | <b>Swine/Forestry Workers</b> | <b>Germany</b> |
| <b>Med Mibrobiol Immun</b> | <b>2014</b> | <b>Krumbholz</b> |              | <b>302</b> | <b>13.2</b> | <b>Other</b>    | <b>Swine/Forestry Workers</b> | <b>Germany</b> |
| Med Microbiol Immunol      | 2012        | Krumbholz        |              | 116        | 15.5        | Mikrogen        | General Population            | Germany        |
| Med Microbiol Immunol      | 2012        | Krumbholz        |              | 106        | 28.3        | Mikrogen        | Swine/Forestry Workers        | Germany        |
| Med Microbiol Immunol      | 2012        | Dremsek          |              | 563        | 11          | Mikrogen        | General Population            | Germany        |
| Med Microbiol Immunol      | 2012        | Dremsek          |              | 301        | 18          | Mikrogen        | Swine/Forestry Workers        | Germany        |
| PLoS One                   | 2014        | Pischke          |              | 114        | 3.5         | MP              | Immune Deficiency             | Germany        |
| PLoS One                   | 2014        | Pischke          | sub-cohort 1 | 208        | 7.7         | MP              | Liver Disease                 | Germany        |
| PLoS One                   | 2014        | Pischke          | sub-cohort 2 | 109        | 2.8         | MP              | Liver Disease                 | Germany        |
| Transfusion                | 2014        | Juhl             |              | 1019       | 6.8         | Mikrogen        | General Population            | Germany        |
| Transpl Infect Dis         | 2012        | Koencke          |              | 52         | 3.8         | Other           | Transplant                    | Germany        |
| Transpl Infect Dis         | 2014        | Pischke          |              | 537        | 2           | MP              | General Population            | Germany        |
| Transpl Infect Dis         | 2014        | Pischke          |              | 537        | 2           | MP              | General Population            | Germany        |
| Transpl Infect Dis         | 2014        | Pischke          |              | 95         | 5.3         | MP              | Transplant                    | Germany        |
| BMC Infect Dis             | 2015        | Schielke         |              | 126        | 21          | Mikrogen        | Swine/Forestry Workers        | Germany        |

|                                                  |             |                  |                                |            |             |               |                               |                    |
|--------------------------------------------------|-------------|------------------|--------------------------------|------------|-------------|---------------|-------------------------------|--------------------|
| Epidemiol Infect                                 | 2014        | Scotto           | General Population             | 450        | 2.7         | Dia.Pro       | General Population            | Italy              |
| Epidemiol Infect                                 | 2014        | Scotto           | Blood Donors                   | 151        | 1.3         | Dia.Pro       | General Population            | Italy              |
| Epidemiol Infect                                 | 2013        | Scotto           |                                | 100        | 2           | Dia.Pro       | Immune Deficiency             | Italy              |
| Infection                                        | 2013        | Rapicetta        |                                | 973        | 11.6        | Other         | Liver Disease                 | Italy              |
| J Prev Med Hyg                                   | 2009        | Maisa            |                                | 130        | 2.3         | Other         | General Population            | Italy              |
| J Prev Med Hyg                                   | 2009        | Masia            |                                | 402        | 5           | Other         | Swine/Forestry Workers        | Italy              |
| World J Gastroenterol                            | 2015        | Scotto           |                                | 450        | 2.7         | Dia.Pro       | General Population            | Italy              |
| World J Gastroenterol                            | 2015        | Scotto           |                                | 120        | 3.3         | Dia.Pro       | Transplant                    | Italy              |
| J Clin Virol                                     | 2014        | Hassing          |                                | 256        | 11.7        | Wantai        | Immune Deficiency             | Netherlands        |
| Blood                                            | 2013        | Versluis         |                                | 328        | 13          | Dia.Pro       | Transplant                    | Netherlands        |
| Epidemiol Infect                                 | 2012        | Verhoef          |                                | 7072       | 1.9         | MP            | General Population            | Netherlands        |
| <b>Epidemiol Infect</b>                          | <b>2008</b> | <b>Bouwknegt</b> |                                | <b>644</b> | <b>1.7</b>  | <b>Abbott</b> | <b>General Population</b>     | <b>Netherlands</b> |
| <b>Epidemiol Infect</b>                          | <b>2008</b> | <b>Bouwknegt</b> |                                | <b>644</b> | <b>4.2</b>  | <b>MP</b>     | <b>General Population</b>     | <b>Netherlands</b> |
| <b>Epidemiol Infect</b>                          | <b>2008</b> | <b>Bouwknegt</b> | <b>swine veterinarians</b>     | <b>49</b>  | <b>12.2</b> | <b>MP</b>     | <b>Swine/Forestry Workers</b> | <b>Netherlands</b> |
| <b>Epidemiol Infect</b>                          | <b>2008</b> | <b>Bouwknegt</b> | <b>swine veterinarians</b>     | <b>49</b>  | <b>8.1</b>  | <b>Abbott</b> | <b>Swine/Forestry Workers</b> | <b>Netherlands</b> |
| <b>Epidemiol Infect</b>                          | <b>2008</b> | <b>Bouwknegt</b> | <b>non-swine veterinarians</b> | <b>153</b> | <b>5.2</b>  | <b>Abbott</b> | <b>Swine/Forestry Workers</b> | <b>Netherlands</b> |
| <b>Epidemiol Infect</b>                          | <b>2008</b> | <b>Bouwknegt</b> | <b>non-swine veterinarians</b> | <b>153</b> | <b>3.9</b>  | <b>MP</b>     | <b>Swine/Forestry Workers</b> | <b>Netherlands</b> |
| Euro Surveill/Transfusion Hogema same collective | 2013        | Slot             |                                | 5239       | 27          | Wantai        | General Population            | Netherlands        |
| J Viral Hepat                                    | 2007        | Herremans        |                                | 50         | 4.2         | MP            | General Population            | Netherlands        |
| J Viral Hepat                                    | 2007        | Herremans        |                                | 1027       | 2.3         | Other         | Liver Disease                 | Netherlands        |

|                       |             |                  |              |               |              |                 |                           |              |
|-----------------------|-------------|------------------|--------------|---------------|--------------|-----------------|---------------------------|--------------|
| Liver Transpl         | 2009        | Haagsma          |              | 285           | 2.1          | MP              | Transplant                | Netherlands  |
| Transfusion           | 2014        | Hogema           |              | 5329          | 27           | Wantai          | General Population        | Netherlands  |
| AIDS                  | 2014        | Pineda           |              | 613           | 26           | Wantai          | Immune Deficiency         | Spain        |
| Am J Trop Med Hyg     | 2008        | Galiana          |              | 101           | 18.8         | Wantai          | Swine/Forestry Workers    | Spain        |
| Am J Trop Med Hyg     | 2008        | Galiana          |              | 97            | 4.1          | Wantai          | General Population        | Spain        |
| Clin Vaccine Immuno   | 2006        | Buti             |              | 1280          | 7.3          | Other           | General Population        | Spain        |
| Gastroenterol Hepatol | 2004        | Sutrez Gonztlez  |              | 325           | 0.6          | Abbott          | General Population        | Spain        |
| HIV Med               | 2012        | Jardi            |              | 238           | 9            | Other           | Immune Deficiency         | Spain        |
| J Infect              | 2014        | Rivero-Juarez    |              | 894           | 9.8          | Wantai          | Immune Deficiency         | Spain        |
| J Med Virol           | 2011        | Fogeda           |              | 2305          | 2.17         | Dia.Pro         | General Population        | Spain        |
| J Med Virol           | 2014        | Lindemann        |              | 448           | 10.4         | Dia.Pro         | Immune Deficiency         | Spain        |
| J Med Virol           | 2010        | Lindemann        |              | 1040          | 3.6          | Dia.Pro         | General Population        | Spain        |
| PLoS One              | 2014        | Riveiro-Barciela |              | 200           | 3.5          | MP              | General Population        | Spain        |
| PLoS One              | 2014        | Riveiro-Barciela |              | 238           | 9.2          | MP              | Immune Deficiency         | Spain        |
| PLoS One              | 2014        | Riveiro-Barciela | sub-cohort 1 | 57            | 17.5         | MP              | Liver Disease             | Spain        |
| PLoS One              | 2014        | Riveiro-Barciela | sub-cohort 2 | 301           | 5            | MP              | Liver Disease             | Spain        |
| PLoS One              | 2014        | Riveiro-Barciela | sub-cohort 1 | 332           | 9.5          | MP              | Transplant                | Spain        |
| PLoS One              | 2014        | Riveiro-Barciela | sub-cohort 2 | 296           | 3.7          | MP              | Transplant                | Spain        |
| <b>Transfusion</b>    | <b>2014</b> | <b>Sauleda</b>   |              | <b>10,000</b> | <b>10.72</b> | <b>Mikrogen</b> | <b>General Population</b> | <b>Spain</b> |
| <b>Transfusion</b>    | <b>2014</b> | <b>Sauleda</b>   |              | <b>10,000</b> | <b>19.96</b> | <b>Wantai</b>   | <b>General Population</b> | <b>Spain</b> |
| PloS One              | 2011        | Kaufmann         |              | 550           | 4.9          | MP              | General Population        | Switzerland  |
| Emerg Infect Dis      | 2011        | Kenfak-Foguena   |              | 735           | 2.4          | MP              | Immune Deficiency         | Switzerland  |

|                                 |             |                |            |             |                |                           |                    |
|---------------------------------|-------------|----------------|------------|-------------|----------------|---------------------------|--------------------|
| <b>PLoS One</b>                 | <b>2013</b> | <b>Schnegg</b> | <b>550</b> | <b>4.9</b>  | <b>MP</b>      | <b>General Population</b> | <b>Switzerland</b> |
| <b>PLoS One</b>                 | <b>2013</b> | <b>Schnegg</b> | <b>550</b> | <b>4.2</b>  | <b>Dia.Pro</b> | <b>General Population</b> | <b>Switzerland</b> |
| <b>PLoS One</b>                 | <b>2013</b> | <b>Schnegg</b> | <b>550</b> | <b>21.2</b> | <b>Wantai</b>  | <b>General Population</b> | <b>Switzerland</b> |
| Emerg Infect Dis                | 2013        | Payne          | 141        | 3.5         | Wantai         | General Population        | UK                 |
| Emerg Infect Dis                | 2013        | Payne          | 146        | 7.1         | Wantai         | Immune Deficiency         | UK                 |
| Eur J Clin Microbiol Infect Dis | 2008        | Dalton         | 500        | 16          | Wantai         | General Population        | UK                 |
| Eur J Gastroenterol Hepatol     | 2008        | Dalton         | 126        | 13          | MP             | Liver Disease             | UK                 |
| HIV Med                         | 2011        | Keane          | 464        | 13.8        | Wantai         | General Population        | UK                 |
| HIV Med                         | 2011        | Keane          | 138        | 9.4         | Wantai         | Immune Deficiency         | UK                 |
| J Clin Virol.                   | 1991        | Ijaz           | 1591       | 13.5        | Wantai         | General Population        | UK                 |
| J Clin Virol.                   | 2004        | Ijaz           | 1140       | 13          | Wantai         | General Population        | UK                 |
| J Med Virol                     | 2013        | Harrions       | 670        | 18.8        | Wantai         | General Population        | UK                 |
| J Med Virol                     | 2013        | Harrions       | 76         | 36.8        | Wantai         | Haemodialysis             | UK                 |
| J Med Virol                     | 2013        | Harrions       | 88         | 18.2        | Wantai         | Transplant                | UK                 |
| <b>J Med Virol</b>              | <b>2010</b> | <b>Bendall</b> | <b>500</b> | <b>3.6</b>  | <b>MP</b>      | <b>General Population</b> | <b>UK</b>          |
| <b>J Med Virol</b>              | <b>2010</b> | <b>Bendall</b> | <b>500</b> | <b>16.2</b> | <b>Wantai</b>  | <b>General Population</b> | <b>UK</b>          |
| Vox Sang                        | 2013        | Cleland        | 1559       | 4.7         | Wantai         | General Population        | UK                 |
| Zoonoses Public Health          | 2010        | Meader         | 412        | 2.4         | MP             | General Population        | UK                 |

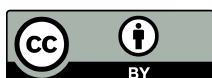

Supplement: viruses-08-00211-s001.pdf [file viruses-08-00211-s001.pdf]
